1 **Water availability dynamics have long-term effects on mature**  
2 **stem structure in *Vitis vinifera***

3 S. Munitz<sup>1,2\*</sup>, Y. Netzer<sup>1,2\*</sup>, Ilana Shtein<sup>1,2</sup> and A. Schwartz<sup>1</sup>

4 <sup>1</sup> R.H. Smith Institute of Plant Science and Genetics in Agriculture, Faculty of Agriculture, Food  
5 and Environment, The Hebrew University of Jerusalem, Rehovot 76100, Israel.

6 <sup>2</sup> The Eastern Regional Research and Development Center, Ariel 40700, Israel.

7

8 E-mail addresses:

9 [sarel.munitz@mail.huji.ac.il](mailto:sarel.munitz@mail.huji.ac.il) [ilanash@ariel.ac.il](mailto:ilanash@ariel.ac.il) [ammon.schwartz@mail.huji.ac.il](mailto:ammon.schwartz@mail.huji.ac.il)

10 Corresponding author:

11 Y. Netzer, [y-netzer@gmail.com](mailto:y-netzer@gmail.com), +972546320280

12 Number of tables: 2, number of figures: 7, word count: 4543 , date of submission: 11/02/18

13

14 **Running title:** Anatomical structure is affected by early season water availability.

15

16 **Highlights:**

17 Water availability early in the season determines vegetative growth and stem anatomical structure  
18 in mature *Vitis vinifera* vines.

19

20 **Abstract:**

21 *Vitis vinifera* is a climbing vine with wide vessels and high hydraulic conductivity. There is a  
22 lack of data on the anatomical structure of the mature vine stem, and most current knowledge is  
23 based on first-year shoots. Moreover, the effect of drought stress on anatomical structure has  
24 been partly reported in shoots of *Vitis vinifera* but not in stems.

25 In current study two irrigation approaches were applied on *Vitis vinifera* Merlot vines: constant  
26 (low, medium and high irrigation) and dynamic (early/late season water deficit). The following  
27 parameters were measured: trunk diameter, annual ring width and area, vessel diameter, specific  
28 hydraulic conductivity and stem water potential.

29 High water availability early in the season (high irrigation and late deficit) resulted in vigorous  
30 vegetative growth (greater trunk diameter, ring width and area), wider vessels and increased

31 specific hydraulic conductivity. The distribution of large xylem vessels was altered by drought  
32 stress, where high water availability early in the season caused a shift of the vessel population  
33 towards the wider frequency classes. Interestingly, the early deficit vines showed more negative  
34 water potential values late in the season compared to the low irrigation vines. This may imply an  
35 effect of anatomical structure on vine water status.

36 **Key words:** Drought stress, specific hydraulic conductivity, vessel diameter, vessel distribution,  
37 *Vitis vinifera*, water availability.

## 38 **Introduction**

39 The genus *Vitis* has been distinguished for its wide (Adkinson 1913; Pratt 1974)  
40 and long xylem vessels (Zimmermann and Jeje 1981; Ewers et al. 1990;  
41 Jacobsen et al. 2012), which characterize lianas. Such hydraulic architecture  
42 makes *Vitis vinifera* an excellent model of water flow in plants according to the  
43 "unit pipe model" as described by Tyree & Ewers (1991), since *Vitis* vessels are  
44 relatively optimal pipes. Since vessel length and diameter are correlated with  
45 stem diameter, mature vine trunks tend to have wider and longer vessels  
46 compared to young stems/shoots (Ewers and Fisher 1989; Jacobsen et al. 2012;  
47 Hacke 2015). Moreover, since vessels in *Vitis* are completely inactivated after 4  
48 to 7 years (Tibbetts and Ewers 2000), in mature vine trunks (older than 7 years)  
49 only the secondary xylem is functional, while the primary xylem created in its  
50 first year is nonfunctional. This fact is crucial, since in contrast to the scalariform  
51 arrangement of intervessel bordered pits of secondary xylem vessel elements, the  
52 primary xylem vessel elements have partial secondary wall thickenings, making  
53 them much more vulnerable to cavitation (Pratt 1974; Choat et al. 2005; Sun et  
54 al. 2006; Brodersen et al. 2011; Craig R Brodersen et al. 2013; Rolland et al.  
55 2015; Hochberg, Herrera, et al. 2016). Indeed, visualization techniques (microCT  
56 / MRI) have shown that in one-year-old stems of *Vitis* the spread of embolism  
57 proceeds from the pith towards the cambium through the primary xylem (Choat  
58 et al. 2010; Craig R Brodersen et al. 2013; Craig Robert Brodersen et al. 2013;  
59 Knipfer et al. 2015; Hochberg, Albuquerque, et al. 2016). An additional  
60 important anatomical feature of mature vine trunks is the ratio between the area  
61 of the pith and the xylem, which decreases with stem maturation (Sun et al.  
62 2006). All of the above suggest that the xylem architecture of the mature trunk

63 differs from that of a young shoot, in a way that makes it less vulnerable to  
64 cavitation.

65 Despite those significant differences, there is a scarcity of information about the  
66 anatomical structure of mature vine trunks, while current reported anatomical  
67 information on vines is based mainly on analysis of one-year-old stems (Schultz  
68 and Matthews 1993; Lovisolo et al. 1998; Schubert et al. 1999; Sun et al. 2006;  
69 Brodersen et al. 2011; Chatelet et al. 2011; Santarosa et al. 2016). In one-year-  
70 old stems, hydraulic structure is reported to vary among *Vitis* cultivars and  
71 rootstocks (Chouzouri and Schultz 2005; Chatelet et al. 2011; Gerzon et al. 2015;  
72 Hochberg et al. 2015; Santarosa et al. 2016; Shtein et al. 2016), and to be  
73 affected by environmental parameters (Schubert et al. 1999). Only a few studies  
74 analyzing anatomical features of xylem in mature *Vitis* trunks have been  
75 published (Zimmermann and Jeje 1981; Ewers et al. 1990; Tibbetts and Ewers  
76 2000; Shtein et al. 2016).

77 Another interesting feature of *Vitis* xylem is the bimodal distribution pattern of  
78 vessel diameters, meaning two distinct vessel size groups – wide and narrow  
79 (Carlquist 1985; Ewers et al. 1990; Wheeler and LaPasha 1994; Shtein et al.  
80 2016). Wide diameter vessels are considered to be more hydraulically efficient,  
81 and tend to be more vulnerable to embolism within the same species (Sperry and  
82 Tyree, 1988; Lo Gullo and Salleo, 1991; Hargrave et al., 1994; Cai and Tyree,  
83 2010; Christman et al., 2012; Scoffoni et al., 2016). The accepted "air-seeding"  
84 theory suggests that the increased vulnerability to embolism of wide vessels is  
85 linked to their enlarged total area of intervessel pits. A wide pit area raises the  
86 average size of the "rare" largest pore, consequently increasing the risk of air  
87 seeding (Choat et al. 2003; Wheeler et al. 2005; Jansen et al. 2009; Cai and  
88 Tyree 2010).

89 Most cultivated vineyards worldwide are located in semi-arid and arid regions  
90 where drought stress is prevalent (Chaves et al. 2007). Nevertheless, compared to  
91 other woody plants, grapevines are often described as relatively vulnerable to  
92 drought stress (Choat et al. 2010; Zufferey et al. 2011; Jacobsen and Pratt 2012;  
93 Hacke 2015). It has been reported that drought stress induces embolism and a  
94 loss of hydraulic function (Schultz and Matthews 1988; Hargrave et al. 1994;  
95 Lovisolo et al. 1998; Choat et al. 2010; Brodersen et al. 2014). Drought stress  
96 also negatively affects vegetative growth and pruning weight of vines (Matthews

1987; Intrigliolo and Castel 2010; Shellie and Bowen 2014; Munitz et al. 2016).  
There is a lack of available information on the effects of drought stress on  
hydraulic conductivity resulting from modifications to *Vitis* xylem anatomy, as  
only a few studies have examined this subject (Lovisolo et al. 1998; Hochberg et  
al. 2015). The current study focuses on the long-term anatomical acclimation to  
drought stress of mature *Vitis vinifera* Merlot vines.

103

## 104 **Materials and Methods**

### 105 *Plant material and experimental design*

106 This study was carried out in a 100-ha commercial vineyard located in the  
107 Judean Plain, Israel (31<sup>0</sup>49'N, 34<sup>0</sup>53'E, elevation 124 m). This region has a semi-  
108 arid climate with predominantly winter rainfall (average 463 mm year<sup>-1</sup>) and high  
109 evapotranspiration (average 1512 mm year<sup>-1</sup>). The vineyard was planted in 1998  
110 with *Vitis vinifera* L cv. 'Merlot' grafted to 140 Ruggeri, and trained onto a two-  
111 wire vertical trellis. Row direction was North/South with a slight tendency to the  
112 West, and vine and row spacing were 1.5 m and 3 m respectively (2222 vines ha<sup>-1</sup>).  
113 The soil was loam (48% sand, 29% silt and 23% clay, field capacity 28 %  
114 vol., wilting point 14 % vol.). Pest management and fertilization in the vineyard  
115 were applied according to standard local agricultural practice.

116 The experimental design was a complete randomized block design with five  
117 irrigation treatments each replicated four times. Each block comprised three rows  
118 (one data and two border rows). Each plot comprised 16 vines per line, with the  
119 outer two vines at each end being buffer vines and the inner 12 vines being  
120 measurement vines (a total of 240 measurement vines, i.e. 12 vines × 5  
121 treatments × 4 replicates).

### 122 *Irrigation treatments*

123 During 2009-2012, five irrigation treatments representing different levels of  
124 deficit irrigation were applied as percentages of crop evapotranspiration (ET<sub>c</sub>).  
125 Crop evapotranspiration was calculated by multiplying reference  
126 evapotranspiration (ET<sub>o</sub>) by the crop coefficient (K<sub>c</sub>), i.e. ET<sub>c</sub> = ET<sub>o</sub> × K<sub>c</sub>. ET<sub>o</sub>  
127 was calculated using data obtained from the adjacent meteorological station, and  
128 K<sub>c</sub> was calculated according to Netzer *et al* (2009) following nondestructive  
129 measurements of leaf area index. For more details about the irrigation method  
130 see Munitz and Netzer (2016). Irrigation treatments followed two different

131 strategies: static irrigation and dynamic (seasonally changing) irrigation.  
132 Dynamic treatments involved alternation of the percentage of  $ET_c$  along the  
133 growing season according to phenological stages (stage I, stage II, stage III) as  
134 defined by Kennedy (2002): stage I – from bloom to bunch closure, stage II –  
135 from bunch closure to veraison (color change to red) and stage III – from  
136 veraison to harvest. Dynamic irrigation treatments were: early deficit (0, 20, 50%  
137 of  $ET_c$ ) and late deficit (50, 20, 20% of  $ET_c$ ). Static irrigation treatments were:  
138 low irrigation (20% of  $ET_c$ ), medium irrigation (35% of  $ET_c$ ) and high irrigation  
139 (50% of  $ET_c$ ).

#### 140 *Stem water potential ( $\Psi_s$ )*

141 Stem water potential ( $\Psi_s$ ) was measured using a pressure chamber (Arimad 2,  
142 Kfar Charuv, Israel). Three sunlit, mature, fully-expanded leaves from each plot  
143 (12 leaves per treatment) were bagged 2 h prior to measurement in plastic bags  
144 covered with aluminum foil. The time elapsing between leaf excision and  
145 chamber pressurization was less than 15 s. The measurements were conducted  
146 one day before irrigation was applied.

#### 147 *Trunk diameter*

148 Measurements were performed monthly with a digital caliper (075430, Signet,  
149 Taiwan) on 48 vines per treatment (12 vines per plot  $\times$  4 replicates). In order to  
150 obtain consistent data, all measured vines (240) were marked 30 cm above  
151 ground with colored tape, and all measurements were taken at this point.

#### 152 *Anatomical sampling*

153 At the end of the experiment (December 2012) xylem cores from representative  
154 vines were sampled 50 cm above ground with an increment borer (5.15 mm Core  
155 3-Thread 8", Haglof, Sweden). Twelve cores were sampled from each treatment  
156 (3 cores per plot  $\times$  4 replicates, 60 cores total). Trunk diameter ( $D$ ; mm) at the  
157 drilling location was recorded. Cores were placed in sterilized water and stored at  
158 4°C until cross sectioned with a sliding microtome (NR17800, Reichert, Austria)  
159 at a thickness of 90  $\mu$ m. In order to increase visual contrast, cross sections were  
160 stained for 60 s in Reactif Genevois solution (FAHN 1954), then flushed with  
161 distilled water. Photographs of stained cross sections were obtained using a  
162 stereo microscope (Olympus SZ2-ILST) coupled with a digital camera (Olympus  
163 LC20) equipped with image acquisition software (LCmicro 5.1, Olympus,  
164 Tokyo, Japan) at  $\times 20$  magnification.

165 *Image analysis*

166 Analysis of cross sections was performed by separately quantifying various  
167 parameters in the visible field for each of four recent growth rings (2009-2012)  
168 using ImageJ software (Rasband, W.S., ImageJ, U.S. National Institutes of  
169 Health, Bethesda, Maryland, USA, <http://imagej.nih.gov/ij/>, 1997-2016). The  
170 abbreviations for structural parameters were taken from Scholz *et al.* (2013). The  
171 following anatomical parameters were measured (Fig. 1): annual ring width ( $W_r$ ;  
172  $\mu\text{m}$ ), bark width ( $W_b$ ;  $\mu\text{m}$ ), xylem radius ( $r_x$ ;  $\mu\text{m}$ ) and inner xylem radius ( $r_i$ ;  
173  $\mu\text{m}$ ). Vessel lumen area ( $A_v$ ;  $\mu\text{m}^2$ ) and number of vessels ( $n$ ) were measured using  
174 the 'analyze particles' tool (see Fig. 2 for explanation); analyzed area ( $A$ ;  $\text{mm}^2$ )  
175 was also measured. A total of 12,177 vessels were measured and used for  
176 subsequent hydraulic conductivity calculations. The detailed calculations for  
177 trunk and vessel parameters are presented in Table 1.

178 *Theoretical specific hydraulic conductivity ( $K_s$ ) calculations*

179 The theoretical specific hydraulic conductivity ( $K_s$ ;  $\text{kg m}^{-1} \text{MPa}^{-1} \text{s}^{-1}$ ) was  
180 calculated using the modified Hagen–Poisuille's equation (Tyree and Ewers  
181 1991):

$$K_s = (\pi\rho/128\eta A_w) \sum_{i=1}^n (d_i^4)$$

182 where  $K_s$  is the specific hydraulic conductivity,  $\rho$  is the density of the fluid in  $\text{kg}$   
183  $\text{m}^{-3}$  (assumed to be  $1000 \text{ kg m}^{-3}$ ),  $\eta$  is the dynamic viscosity of the fluid in  $\text{MPa s}^{-1}$   
184 (assumed to be  $1 \times 10^{-9} \text{ MPa s}^{-1}$ ),  $A_w$  is the area ( $\text{m}^2$ ) of the xylem cross section  
185 analyzed,  $d$  is the diameter (m) of the  $i^{\text{th}}$  vessel and  $n$  is the total number of  
186 vessels in the measured area.

187 Hydraulic conductivity per annual ring ( $K_{ar}$ ,  $\text{kg m}^{-1} \text{MPa}^{-1} \text{s}^{-1}$ ) was calculated by  
188 multiplying the theoretical xylem specific hydraulic conductivity ( $K_s$ ) by annual  
189 growth ring area ( $A_r$ ,  $\text{m}^2$ ).

190 Frequency classes for calculation of total vessel number and total conductivity  
191 were established at intervals of  $20 \mu\text{m}$  (Fig. 3). For calculation of vessel density  
192 and vessel average diameter, vessels were separated into two size categories  
193 ( $>100 \mu\text{m}$ ,  $\leq 100 \mu\text{m}$ ), since *Vitis* has a bimodal distribution of xylem vessels  
194 (Fig. 3A).

195 *Statistical analysis*

196 The software program JMP7 (SAS Institute, Cary, NC) was used for all  
197 statistical procedures. Data were analyzed via analysis of variance (ANOVA),  
198 and means were separated according to the least significant difference (LSD) at  $p$   
199  $\leq 0.05$  using the Tukey-Kramer test.

200

## 201 **Results**

### 202 *Stem vessel distribution*

203 The distribution of stem xylem vessels in all irrigation treatments showed a  
204 classic bi-modal pattern. The small vessels ( $< 100 \mu\text{m}$ ) constituted the majority  
205 (61.3%) of total vessel number, while the large vessels comprised only 38.7% of  
206 total vessels (Fig. 3A). In contrast, the theoretical hydraulic conductivity showed  
207 a reverse distribution, where the large vessels contributed 97.2% of total  
208 conductivity (Fig. 3B), whereas the contribution of the more abundant small  
209 vessels was negligible.

### 210 *Seasonal changes in trunk diameter*

211 As an integrative indicator of vegetative growth, seasonal changes in trunk  
212 diameter were monitored monthly during 2011-2012 (following two years of  
213 differential irrigation application after 11 years of identical irrigation). Seasonal  
214 trends of trunk diameter development were similar in both years in all irrigation  
215 treatments (Fig. 4); an increase in trunk diameter began two weeks after bud  
216 break and continued until stage II (mid-June), then remained stable until the next  
217 season. In 2011, a decrease in trunk diameter was apparent during stage III, in all  
218 irrigation treatments. Vines in different irrigation treatments showed significant  
219 differences in trunk diameter throughout the entire experimental period (Fig. 4).  
220 Among static irrigation vines, trunk diameter was positively correlated with  
221 applied water amounts, even though the trunk of the medium irrigation vines was  
222 slightly narrower than expected (Fig. 4A). In the dynamic irrigation treatments,  
223 the early deficit vines exhibited the narrowest trunk diameter of all vines in all  
224 irrigation treatments during the entire measuring period. The late deficit vines  
225 had an intermediate trunk diameter throughout the measuring period (Fig. 4B).

### 226 *Structural parameters*

227 Vines subjected to the static irrigation treatments differed significantly in their  
228 annual ring width, with a positive effect of applied water amounts on ring width  
229 (Table 2). Within the dynamic irrigation treatments, the late deficit vines had the

230 widest annual ring width (901.5  $\mu\text{m}$ ), very similar to the width of the high  
231 irrigation vines (Table 2). Surprisingly, the early deficit vines had the narrowest  
232 annual ring width (686  $\mu\text{m}$ ) even compared to the low irrigation vines (719  $\mu\text{m}$ ).  
233 The general trend of annual ring area resembled the trend of annual ring width.  
234 Ring area was positively affected by increasing water amounts in static treatment  
235 vines. In dynamic irrigation treatments, early deficit vines had the smallest  
236 annual ring area of the five treatments, while the late deficit vines had a  
237 relatively large ring area, intermediate between that of the high and medium  
238 irrigation vines (Table 2).

239 The density of 'small' ( $\leq 100\mu\text{m}$ ) and 'large' ( $>100\mu\text{m}$ ) vessels was not  
240 significantly affected by irrigation treatments, although a reduction in the density  
241 of 'small' vessels in high irrigation vines was observed. The 'large' ( $>100\mu\text{m}$ )  
242 vessel diameter of the high irrigation vines was significantly wider than that of  
243 the low and medium irrigation vines. In the dynamic irrigation treatments, early  
244 deficit vines had significantly narrower 'large' vessels than all vines in all other  
245 irrigation treatments, while the late deficit vines had the widest (Table 1). The  
246 trend for 'small' ( $\leq 100\mu\text{m}$ ) vessel diameter was less clear, with early deficit and  
247 medium irrigation vines exhibiting significantly wider vessels than all other  
248 vines. The trend in specific hydraulic conductivity was similar to that of 'large'  
249 ( $>100\mu\text{m}$ ) vessel diameter, where the high irrigation and late deficit vines had  
250 significantly higher hydraulic conductivity (Table 1) than vines in other  
251 treatments. Hydraulic conductivity per annual ring increased significantly with  
252 increasing water amounts in the static irrigation treatments, whereas in dynamic  
253 treatments the early deficit vines had the lowest conductivity, while the late  
254 deficit vines had high conductivity (slightly lower than the high irrigation vines).

255 The relationship between hydraulic conductivity per annual ring and seasonal  
256 water amount (Fig. 6a) was weak and non-significant ( $R^2 = 0.21$ ), while the  
257 relationship between hydraulic conductivity per annual ring and water amounts  
258 applied during stage I (bloom to bunch closure, Fig. 5b) was stronger and  
259 significant ( $R^2 = 0.60$ ,  $p < 0.001$ ).

#### 260 *Stem hydraulic conductivity distribution among vessel size classes*

261 Specific stem hydraulic conductivity was calculated separately for each vessel  
262 size class (Fig 6). Among static irrigation treatments, the conductivity  
263 distribution was similar, but several differences among treatments were



264 observed. In low irrigation vines a higher percentage of the calculated hydraulic  
265 conductivity was derived from narrow vessel classes, in the medium irrigation  
266 vines - from wide vessel classes, and in the high irrigation vines - from the  
267 widest vessel classes (Fig 6a). In the dynamic irrigation treatments, the early  
268 deficit vines had a higher amount of hydraulic conductivity derived from  
269 narrower frequency classes, while the hydraulic conductivity in late deficit vines  
270 shifted towards the wide frequency classes (Fig 6b).

#### 271 *Stem water potential*

272 Significant differences in water potential ( $\Psi_s$ ) between vines in different  
273 irrigation treatments were observed during stages II and III (Fig. 7). The daily  
274 trend of  $\Psi_s$  was similar among treatments, with a steep decrease in  $\Psi_s$  values  
275 being recorded throughout the morning, followed by stabilization and  
276 improvement in  $\Psi_s$  during the afternoon (Fig. 7). In stage II an improvement in  
277  $\Psi_s$  values during the afternoon was apparent only in the high and medium  
278 irrigation vines (Fig. 7B). On both measuring days, the high irrigation vines had  
279 the highest  $\Psi_s$  values during the course of the day, the medium irrigation vines  
280 were at an intermediate level and the low irrigation vines had the lowest  $\Psi_s$ . In  
281 the dynamic irrigation treatments, the early deficit vines had low  $\Psi_s$  values  
282 during stage II (lower than the low irrigation vines) and intermediate values  
283 during stage III (resembling those of the medium irrigation vines). The late  
284 deficit vines had low  $\Psi_s$  values on both dates, even compared to the values of the  
285 low irrigation vines (Fig. 7).

286

## 287 **Discussion**

### 288 *Vegetative growth*

289 Vegetative growth can serve as a good indicator of water availability (Tyree and  
290 Ewers 1991; Munitz et al. 2016). In the present study we continuously monitored  
291 trunk growth. In all irrigation treatments, an increase in trunk diameter occurred  
292 mainly early in the season (from two weeks before blooming until bunch closure)  
293 (Fig. 4). Early season trunk growth has been previously reported in Merlot (Ton  
294 and Kopyt 2004) and in other *Vitis vinifera* cultivars (Myburgh 1996; Ton and  
295 Kopyt 2004; Intrigliolo and Castel 2007; Montoro et al. 2011; Papi and Storchi  
296 2012; Edwards and Clingeleffer 2013).

297 The high irrigation and late deficit vines, which received higher water amounts  
298 early in the season, exhibited the widest trunk diameter of all vines. Similarly,  
299 annual ring width and area, which represent annual vegetative growth, were also  
300 positively correlated with high irrigation early in the season (Stage I). The high  
301 irrigation and late deficit vines had significantly wider ring width and area in  
302 comparison to the low irrigation and early deficit vines (Table 2). The dominance  
303 of early season vegetative growth in *Vitis vinifera* can be explained by the fact  
304 that cambial activity to produce new vascular elements takes place mainly during  
305 the early stage of the growing season (until 20 days after bunch closure,  
306 Bernstein and Fahn, 1960).

### 307 *Hydraulic structure*

308 A significant increase (9 - 11%) in the large vessel diameter was recorded in the  
309 high irrigation and late deficit vines (Table 2), even though no significant  
310 difference in the density of the large vessels was found. This implies that water  
311 availability early in the season affects large vessel diameter rather than vessel  
312 density. The same effect of drought stress reducing average vessel diameter has  
313 been reported in *Vitis vinifera* shoots (Lovisolo et al. 1998) and petioles  
314 (Hochberg et al. 2015). Interestingly, in small vessels the opposite was found,  
315 where the vessels of the early deficit vines, which received minimal water early  
316 in the season, exhibited the widest diameter (Table 2). Although the small  
317 vessels comprised the majority of the total vessels (61%), they contributed only a  
318 negligible 3% of total hydraulic conductivity (Fig. 3). A similar phenomenon of  
319 dominance of wide diameter vessels with respect to total hydraulic conductivity  
320 has also been recorded in other species (Hargrave et al. 1994; Tibbetts and Ewers  
321 2000).

322 From inspection of the hydraulic conductivity distribution, it can be deduced that  
323 high water amounts early in the season result in a higher percentage of hydraulic  
324 conductivity derived from wider frequency classes (Fig. 6). This phenomenon is  
325 more pronounced in late deficit vines, possibly due to their dynamic irrigation  
326 treatment. It is well known that in *Vitis*, as in many other lianas, wide vessels are  
327 formed at the beginning of the growing period and narrow vessels are formed at  
328 the end (extreme diffuse-porous), causing a bi-modal distribution of vessels  
329 (Pratt 1974; Kozlowski 1983; Ewers et al. 1990; Wheeler and LaPasha 1994).  
330 Applying high irrigation amounts during the formation of wide vessels and

331 reducing water allocation during the formation of narrow vessels (late deficit),  
332 should result in larger wide vessels and smaller narrow vessels. This will lead to  
333 an increased proportion of hydraulic conductivity being derived from wide  
334 vessels. As a result, late deficit vines are expected to be more susceptible to  
335 embolism formation in comparison to low irrigation vines.

336 Specific hydraulic conductivity ( $K_s$ ) represents the conducting efficiency of the  
337 xylem tissue (Tyree and Ewers 1991). The high irrigation and late deficit vines  
338 had significantly increased  $K_s$  (24 - 33%) compared to other vines (Table 2). This  
339 means that limited water availability early in the growth season (bloom to bunch  
340 closure) results in decreased  $K_s$ . Since there is a good correlation between  
341 measured and calculated hydraulic conductivity (Salleo et al. 1985; Hargrave et  
342 al. 1994; Lovisolo et al. 1998; Nolf et al. 2017) our theoretical  $K_s$  results may  
343 indicate an actual change in the hydraulic conductivity of vines in response to  
344 drought stress.

345 Hydraulic conductivity per annual growth ring ( $K_{ar}$ ) is an integrated parameter  
346 combining both hydraulic conductivity ( $K_s$ ) and vegetative growth (trunk  
347 diameter and ring width). As with ring area and hydraulic conductivity, the high  
348 irrigation and late deficit vines had significantly increased hydraulic conductivity  
349 per annual ring ( $K_{ar}$ , Table 2). Interestingly, the high irrigation vines had 9%  
350 higher  $K_{ar}$  (not significant) than the late deficit vines. This difference can be  
351 attributed to the reduction of water amounts in late deficit vines during bunch  
352 closure, while cambial activity in the stem persisted for a further 20 days  
353 (Bernstein and Fahn 1960).

354 Reinforcement of the notion that most of the vegetative growth and xylem  
355 development occur early in the season can be found in the correlation between  
356 the amounts of applied water and hydraulic conductivity per annual ring,  $K_{ar}$   
357 (Fig. 5). While annual water applied had a weak and non-significant correlation  
358 with  $K_{ar}$  ( $R^2 = 0.21$ ), water amount applied during stage I was strongly and  
359 significantly correlated to  $K_{ar}$  ( $R^2 = 0.6$ ,  $P < 0.001$ ).

### 360 *Water potential*

361 Stem water potential is known to be a sensitive indicator of vine water status  
362 (Choné et al. 2001; Munitz et al. 2016). Indeed, on both measuring days static  
363 irrigation vines differed significantly in their stem water potentials, according to  
364 the water amounts applied, throughout the entire day. Those differences in stem

365 water potential were present from bunch closure until harvest (Munitz et al.  
366 2016). Interestingly, late deficit vines were more drought stressed (more negative  
367 stem water potential) than low irrigation vines on both measuring days, even  
368 though they received on average 31% more water prior to the measuring days.  
369 Those differences in stem water potential cannot be attributed to a broader  
370 canopy, since the late deficit and low irrigation vines had similar leaf area on  
371 measuring days (Munitz et al. 2016). Water potentials of -1.4 MPa, recorded on  
372 both measuring days, have been reported to cause a 30 - 80 % decrease in  
373 hydraulic conductivity of *Vitis vinifera* shoots (Alsina et al. 2007; Choat et al.  
374 2010; Jacobsen and Pratt 2012).

375 The increased drought stress in late deficit vines can be explained by a greater  
376 hydraulic conductivity loss. As stated before, wide vessels are more susceptible  
377 to embolism formation. Late deficit vines, with a higher percentage contribution  
378 of wide vessels to total hydraulic conductivity, are expected to experience greater  
379 hydraulic loss at a similar water potential. Increased hydraulic loss will, in turn,  
380 lead to increased drought stress e.g. more negative water potential (Tyree et al.  
381 1991). Another explanation for the increased drought susceptibility of late deficit  
382 vines compared with low irrigation vines, can be found by examining their  
383 Carlquist's "vulnerability index" (1977). The index is calculated by dividing  
384 average vessel diameter by vessel density, where a lower value is interpreted as  
385 greater redundancy of vessels and improved capability of withstanding drought  
386 stress. The large vessels of the late deficit vines have an index of 17.0 while low  
387 irrigation vines have an index of 14.9.

#### 388 *Structural parameters as compared to values from literature*

389 Generally, our results seem to be in agreement with values presented in the  
390 literature. The annual increase in trunk diameter of mature vines measured in this  
391 study (1.5 – 2.5 mm, Fig. 4), is similar to that reported for a number of *Vitis*  
392 *vinifera* cultivars (0.5 - 3.5 mm) (Bernstein and Fahn 1960; Myburgh 1996; Ton  
393 and Kopyt 2004). Similarly, the range of annual ring width measured in this  
394 study (720 - 901  $\mu\text{m}$ ) is consistent with values reported for mature *Vitis vinifera*  
395 cultivars (100 - 1300  $\mu\text{m}$ ) (Perold 1927; Bernstein and Fahn 1960), and the range  
396 of annual ring area found in this study (104 - 134  $\text{mm}^2$ ) resembles that of  
397 Cabernet Sauvignon vines (120 - 240  $\text{mm}^2$ , Shtein *et al.*, 2016).

398 The average diameter of large vessels measured in this study (147 - 158  $\mu\text{m}$ ) is  
399 considerably smaller than that reported for *Vitis vinifera* cv. Cabernet Sauvignon.  
400 While in the current study water availability of Merlot vines in different  
401 irrigation regimes triggered a maximal difference of 11  $\mu\text{m}$  in vessel diameter  
402 (Table 2), the difference between the two cultivars stands at more than 50  $\mu\text{m}$ .  
403 This implies an inherent genetic distinction in stem xylem anatomy between *Vitis*  
404 *vinifera* cultivars, as reported previously for petioles and shoots (Chouzouri and  
405 Schultz 2005; Chatelet et al. 2011; Tombesi et al. 2014; Gerzon et al. 2015;  
406 Hochberg et al. 2015; Santarosa et al. 2016). Typical values of specific hydraulic  
407 conductivity of liana stems (Milburn 1979) are 65 - 349  $\text{kg m}^{-1} \text{MPa}^{-1} \text{s}^{-1}$ ; our  $K_s$   
408 results (142 - 188  $\text{kg m}^{-1} \text{MPa}^{-1} \text{s}^{-1}$ ) are in the middle of this range. Values of  $K_{ar}$   
409 reported for *Vitis vinifera* cv. Cabernet Sauvignon (0.07 - 0.11,  $\text{kg m}^{-1} \text{MPa}^{-1} \text{s}^{-1}$ )  
410 are considerably higher than those calculated in this study, due to the wider  
411 vessels and ring area measured in Cabernet Sauvignon vines.

#### 412 *Conclusions*

413 In the current study, we conducted a comprehensive structural analysis of the  
414 mature stem xylem of *Vitis vinifera*, combined with physiological measurements.  
415 The stem comprises the perennial part of the deciduous vine and its anatomical  
416 structure constitutes the long term "memory" of the vine, yet very little  
417 information about the anatomical features of mature *Vitis* stems is available. One  
418 example of this "memory" is the fact that the current year's vine canopy develops  
419 while consuming water conducted through vessels differentiated in previous  
420 years. Most of the vine's canopy develops in the early stages of the growing  
421 season, about 60 days from budbreak (Ben-Asher et al. 2006; Intrigliolo et al.  
422 2008; Romero et al. 2010; Munitz et al. 2016). Cambial tissue begins its activity  
423 about two weeks after budbreak (Bernstein and Fahn 1960). Vessels become  
424 hydraulically active about four weeks after their initial differentiation is initiated  
425 (Halis et al. 2012; Hacke 2015): two weeks for differentiation, expansion and  
426 formation of secondary walls and at least two additional weeks for the creation of  
427 perforation plates by autolysis of axial cell walls. Practically this means that  
428 current year vessels are functional no less than 54 days after budbreak, when  
429 canopy development has almost ceased.  
430 There is a lack of information about the effects of drought stress on *Vitis* xylem  
431 structure (Lovisololo et al. 1998), especially in mature stems. Our research can

432 contribute to the understanding of mature stem xylem structure and how it is  
433 affected by drought stress in the long term.

434 *Acknowledgments*

435 This study was partly sponsored by the Israeli Wine Grape Council. The authors  
436 thank Michal Akerman and Dan Aluf for their assistance in setting up this study,  
437 and the dedicated growers of Kibbutz Hulda: Silvio Feldman, Robbie Handel and  
438 Yigal Gad. We particularly thank Yechezkel Harroch and Elazar Quinn for  
439 assisting in the field and to Ami Charitan and Ziv Charit from Netafim for  
440 donating the irrigation system. We thank the agronomists of Barkan Winery,  
441 Elad Gutman and Yakov Cohen-Achdut for their collaboration. We also thank  
442 Eran Harkabi from the Israel Ministry of Agriculture and Rural Development for  
443 his assistance.

## References

**Table 1.** Calculations used for trunk and vessel parameters.

| Parameter        | Abbreviation | Unit             | Formula                               |
|------------------|--------------|------------------|---------------------------------------|
| Vessel diameter  | $d$          | $\mu\text{m}$    | $d = (4 * A_v / \pi)^{0.5}$           |
| Vessel density   | $V_D$        | $\text{mm}^{-2}$ | $V_D = n/A$                           |
| Trunk radius     | $R$          | $\mu\text{m}$    | $R = D/2$                             |
| Xylem radius     | $r_x$        | $\mu\text{m}$    | $r_x = R - W_b$                       |
| Annual ring area | $A_r$        | $\text{mm}^2$    | $A_r = \pi * (r_x)^2 - \pi * (r_i)^2$ |



**Table 2.** Water amounts, anatomic and hydraulic parameters. ‘Hulda’ Merlot vineyard, 2009 - 2012.

| Irrigation treatment | Water amount (mm season <sup>-1</sup> ) | Annual ring width (μm) | Annual ring area (mm <sup>2</sup> ) | Large vessel density (mm <sup>-2</sup> ) | Small vessel density (mm <sup>-2</sup> ) | Large vessel average diameter (μm) | Small vessel average diameter (μm) | Specific hydraulic conductivity (kg m <sup>-1</sup> MPa <sup>-1</sup> s <sup>-1</sup> ) | Hydraulic conductivity per annual ring (kg m MPa <sup>-1</sup> s <sup>-1</sup> ) |
|----------------------|-----------------------------------------|------------------------|-------------------------------------|------------------------------------------|------------------------------------------|------------------------------------|------------------------------------|-----------------------------------------------------------------------------------------|----------------------------------------------------------------------------------|
| Low                  | 105                                     | 719.9 <sup>bc</sup>    | 104.4 <sup>bc</sup>                 | 9.9                                      | 16.9                                     | 147.9 <sup>b</sup>                 | 37.5 <sup>b</sup>                  | 142.5 <sup>b</sup>                                                                      | 0.0152 <sup>b</sup>                                                              |
| Medium               | 184                                     | 835.6 <sup>ab</sup>    | 124.2 <sup>ab</sup>                 | 9.6                                      | 14.7                                     | 147.1 <sup>b</sup>                 | 43.3 <sup>a</sup>                  | 144.0 <sup>b</sup>                                                                      | 0.0179 <sup>b</sup>                                                              |
| High                 | 256                                     | 891.4 <sup>a</sup>     | 141.5 <sup>a</sup>                  | 10.3                                     | 12.6                                     | 154.9 <sup>a</sup>                 | 40.3 <sup>b</sup>                  | 188.6 <sup>a</sup>                                                                      | 0.0273 <sup>a</sup>                                                              |
| Early deficit        | 143                                     | 686.0 <sup>c</sup>     | 100.9 <sup>c</sup>                  | 9.7                                      | 15.5                                     | 142.1 <sup>c</sup>                 | 45.5 <sup>a</sup>                  | 127.2 <sup>b</sup>                                                                      | 0.0128 <sup>b</sup>                                                              |
| Late deficit         | 141                                     | 901.5 <sup>a</sup>     | 134.3 <sup>a</sup>                  | 9.3                                      | 15.8                                     | 158.5 <sup>a</sup>                 | 38.3 <sup>b</sup>                  | 188.3 <sup>a</sup>                                                                      | 0.0257 <sup>a</sup>                                                              |

Values represent means (n = 12). Within each column, means followed by different letters are significantly different ( $P < 0.05$ ) according to Tukey's test.

### **Figure legends**

**Figure 1.** Schematic cross section diagram with abbreviations used for trunk parameter calculations.

**Figure 2.** Stem cross section of *Vitis vinifera* cv. Merlot. (A) Cross section image as acquired by stereo microscope. (B) Image processing to 8-bit. (C) Image conversion to black and white (binarization) and selection of annual ring to be analyzed (yellow line). (D) Measurement of vessel area.

**Figure 3.** (A) Distribution of stem xylem vessels according to diameter classes ( $\mu\text{m}$ ) in Merlot vines of all irrigation treatments. (B) Distribution of hydraulic conductivity according to diameter classes ( $\mu\text{m}$ ) in Merlot vines of all irrigation treatments. Vessel classes were divided into two size categories:  $\leq 100 \mu\text{m}$  (black bars) and  $> 100 \mu\text{m}$  (gray bars). Data represent vessels from all irrigation treatments during 2009-2012,  $n = 12177$  vessels.

**Figure 4.** (A) Biennial pattern of trunk diameter development of Merlot vines exposed to low irrigation (closed circles), medium irrigation (closed squares) and high irrigation (closed triangles), in 2011 and 2012. (B) Biennial pattern of trunk diameter development of Merlot vines exposed to early deficit (open circles) and late deficit (open squares), in 2011 and 2012. Each point is the mean of 48 vines (12 vines per replicate). The vertical bars denote one standard error.

**Figure 5.** (A) Relationship between annual water applied and hydraulic conductivity per annual growth ring in Merlot vines of all irrigation treatments. (B) Relationship between water amount applied during stage I (bloom to bunch closure) and hydraulic conductivity per annual growth ring in Merlot vines of all irrigation treatments. Each point is the mean of 12 vines (3 vines per replicate). The vertical bars denote one standard error.

\*Significant at  $P < 0.001$ .

**Figure 6.** (A) Distribution of hydraulic conductivity according to diameter classes ( $\mu\text{m}$ ) in Merlot vines exposed to low irrigation (solid line), medium irrigation (dotted line) and high irrigation (dashed line). (B) Distribution of hydraulic conductivity according to diameter classes ( $\mu\text{m}$ ) in Merlot vines exposed to early deficit (solid line) and late deficit (dashed line). Data represent vessels from all analyzed years (2009-2012),  $n = 12177$  vessels.

**Figure 7.** (A) Daily pattern of stem water potential of Merlot vines exposed to low irrigation (closed circles), medium irrigation (closed squares), high irrigation (closed triangles), early deficit (open circles) and late deficit (open squares), on 10/08/11. (B) Daily pattern of stem water potential of Merlot vines exposed to low irrigation (closed circles), medium irrigation (closed squares), high irrigation (closed triangles), early deficit (open circles) and late deficit (open squares), on 26/07/12. Each point is the mean of 12 leaves (3 vines per replicate). The bars denote one standard error.

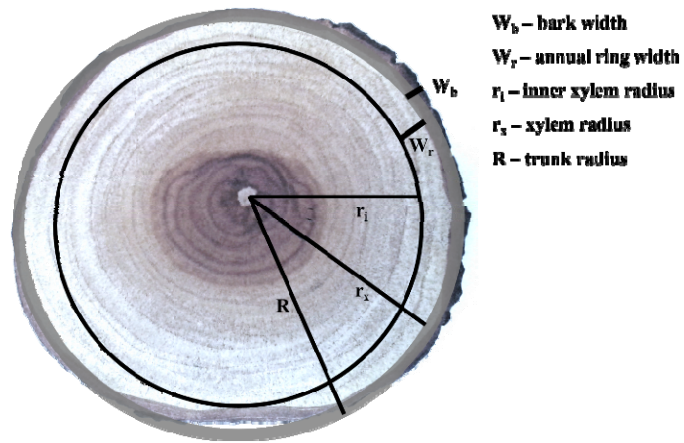

*Fig.*

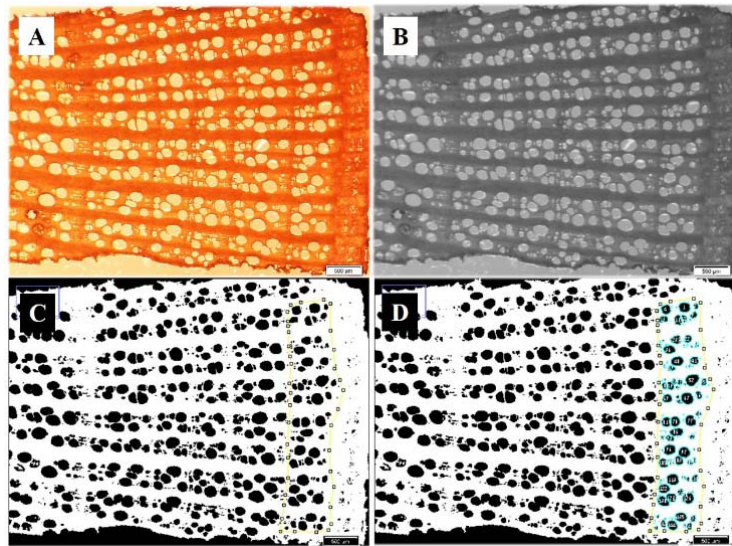

*Fig. 2*

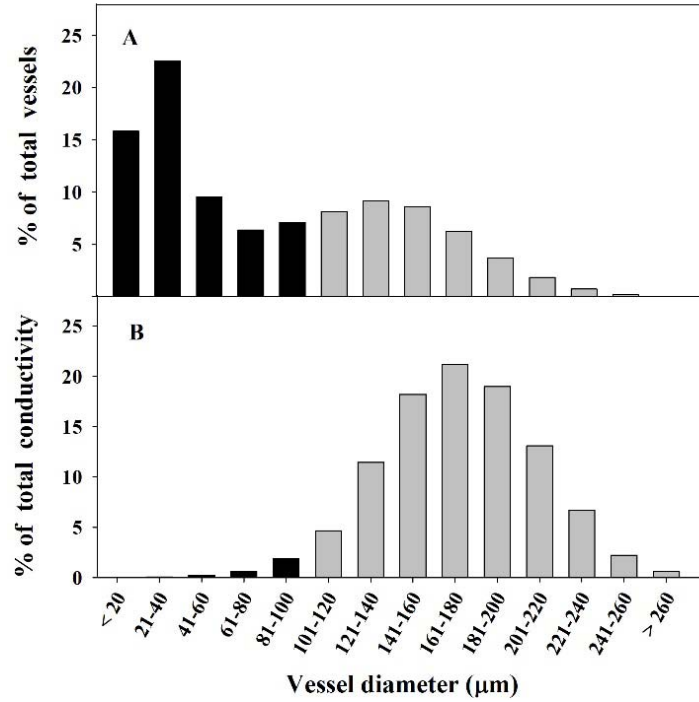

*Fig. 3*

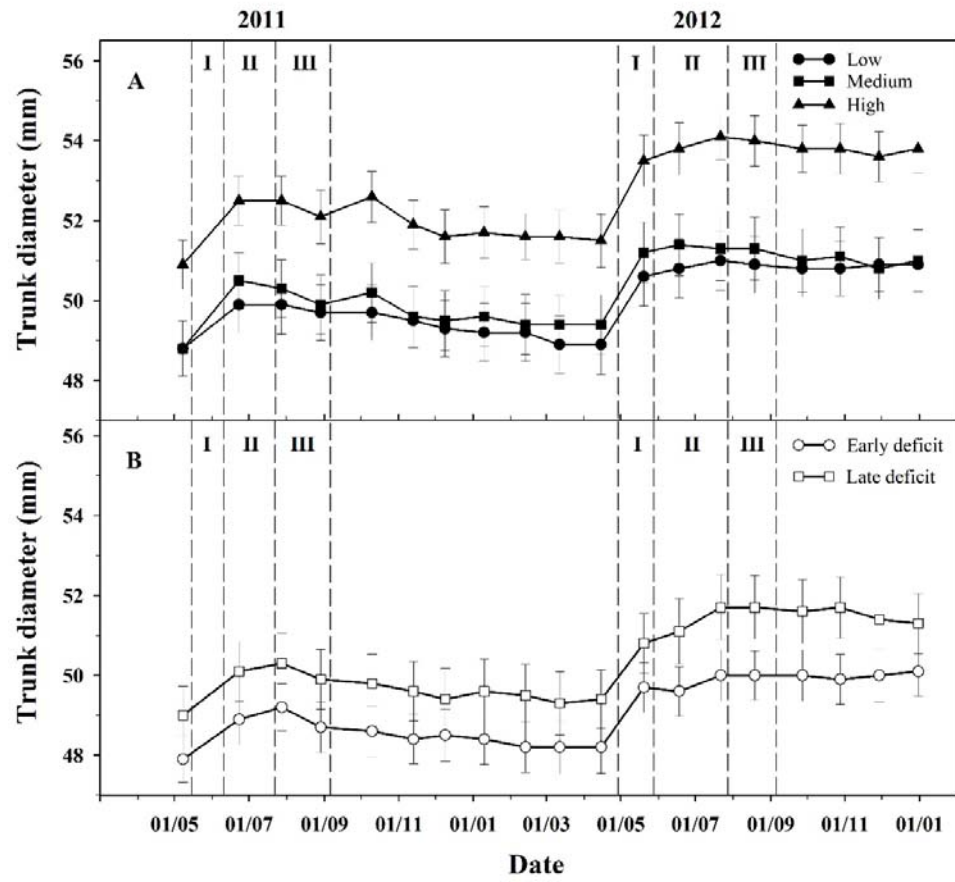

Fig. 4

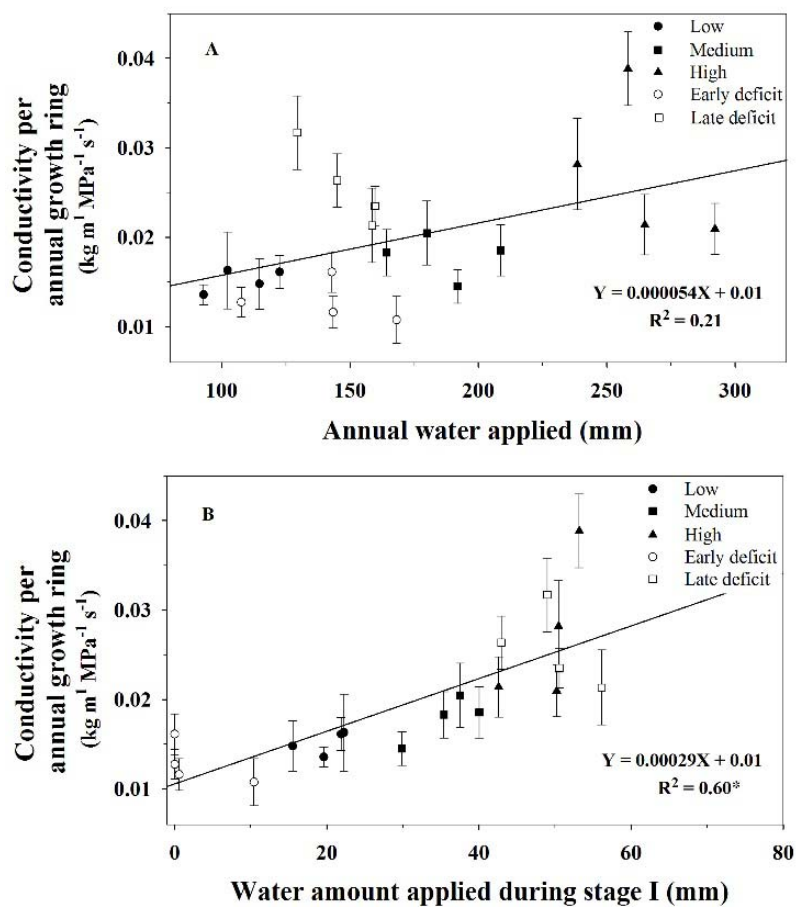

Fig. 5

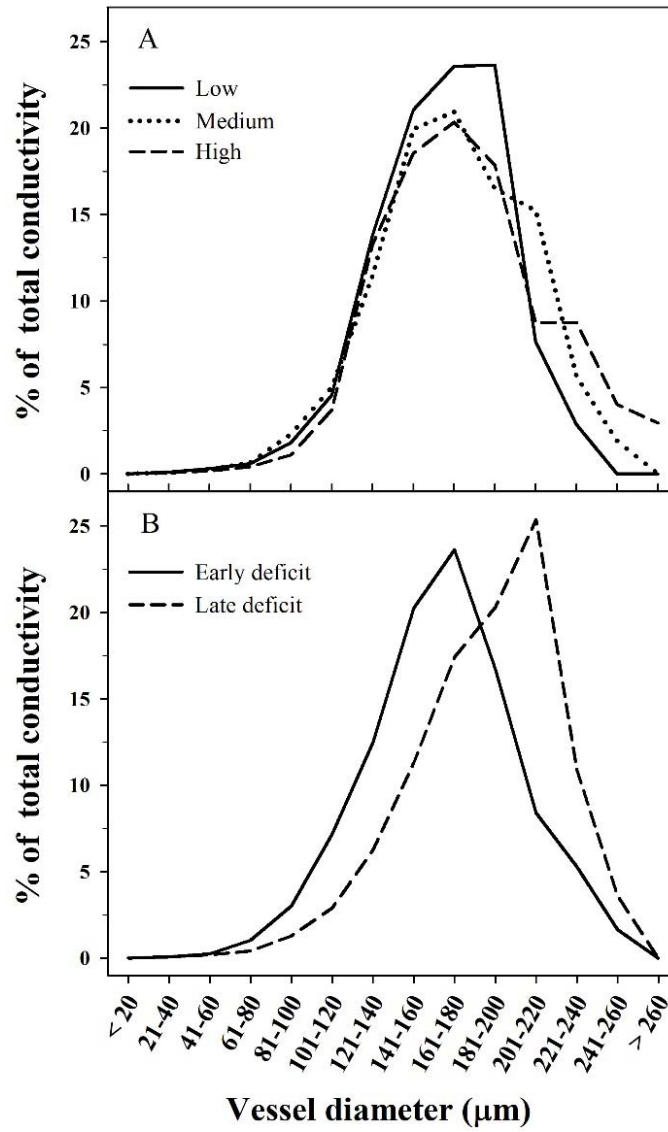

*Fig. 6*



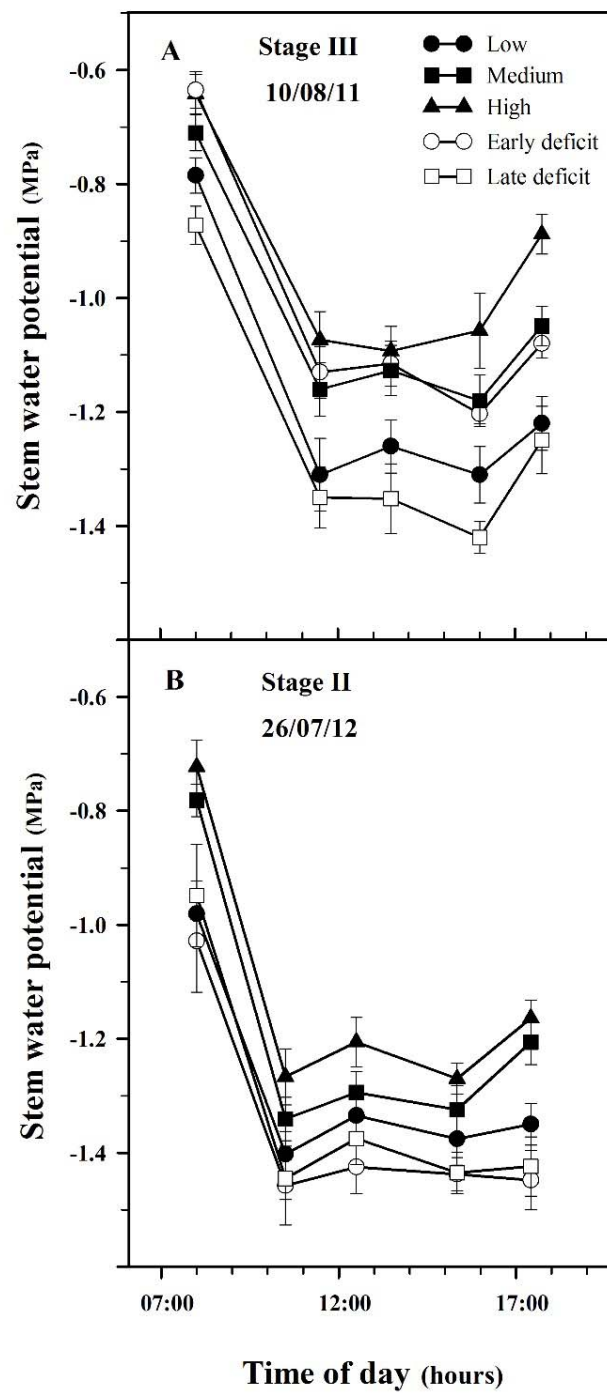

Fig. 7
